# Supplementary material for: A homogenous nanoporous pulmonary drug delivery system based on metal-organic frameworks with fine aerosolization performance and good compatibility
Source: PubMed Central journal article supplement — Acta Pharm Sin B. 2020 Aug 3;10(12):2404–16. doi: 10.1016/j.apsb.2020.07.018 (PMC7745127; doi:10.1016/j.apsb.2020.07.018), 2020-08-03
Supplement: mmc1.pdf [file mmc1.pdf]

## Supporting Information for

### ORIGINAL ARTICLE

#### **A homogenous nanoporous pulmonary drug delivery system based on metal-organic frameworks with fine aerosolization performance and good compatibility**

Yixian Zhou<sup>a,†</sup>, Boyi Niu<sup>a,†</sup>, Biyuan Wu<sup>a</sup>, Sulan Luo<sup>a</sup>, Jintao Fu<sup>a</sup>, Yiting Zhao<sup>a</sup>, Guilan Quan<sup>b,\*</sup>, Xin Pan<sup>a</sup>, Chuanbin Wu<sup>a,\*</sup>

<sup>a</sup>*School of Pharmaceutical Sciences, Sun Yat-sen University, Guangzhou 510006, China*

<sup>b</sup>*College of Pharmacy, Jinan University, Guangzhou 510632, China*

<sup>†</sup>These authors made equal contributions to this work.

\*Corresponding authors.

E-mail addresses: wuchuanb@mail.sysu.edu.cn (Chuanbin Wu),  
xiaoplanet@163.com (Guilan Quan).

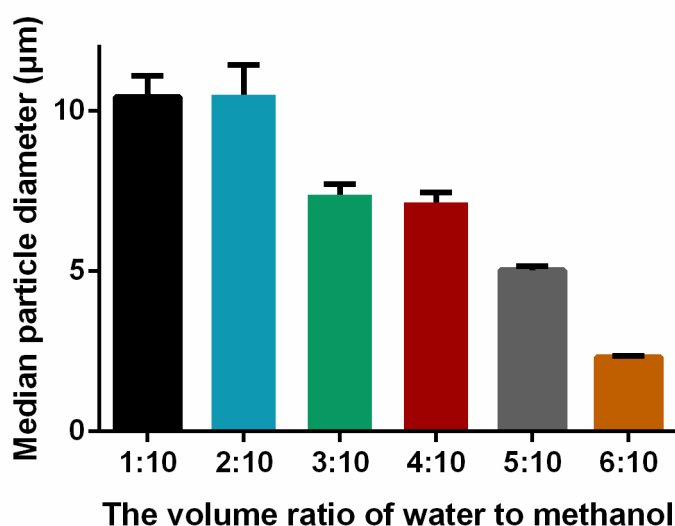

**Figure S1** Particle size of CD-MOF prepared with different volume ratios of methanol to water (Data are expressed as mean  $\pm$ SD,  $n=3$ ).

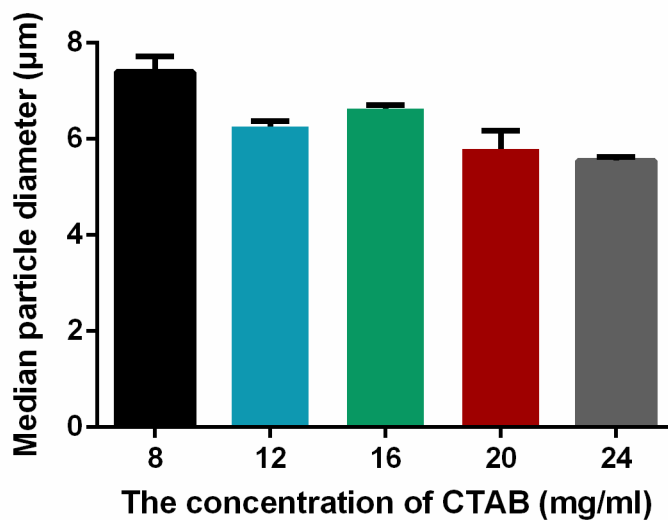

**Figure S2** Particle size of CD-MOF prepared with different concentrations of CTAB

(Data are expressed as mean  $\pm$ SD,  $n=3$ ).

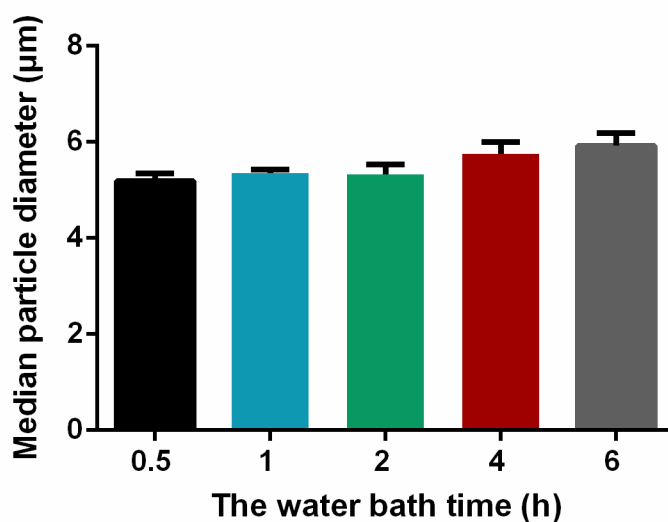

**Figure S3** Particle size of CD-MOF prepared with different water bath time (Data are

expressed as mean  $\pm$ SD,  $n=3$ ).

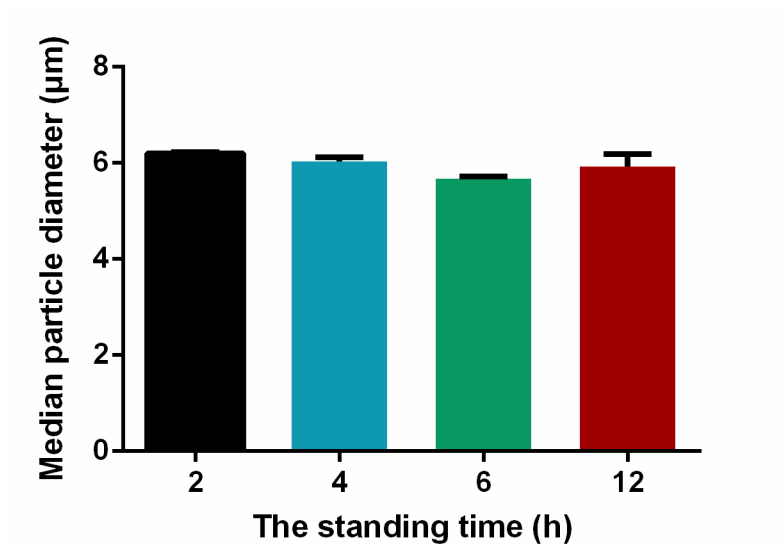

**Figure S4** Particle size of CD-MOF prepared with different standing time (Data are expressed as mean  $\pm$ SD,  $n=3$ ).

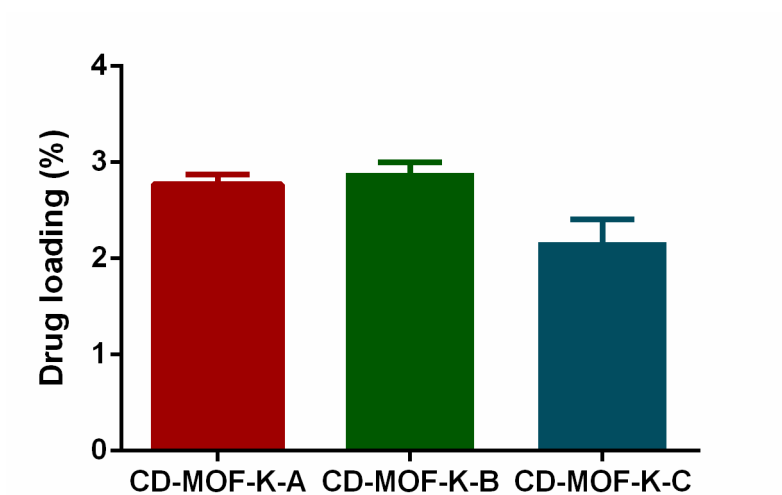

**Figure S5** The drug loading of CD-MOF-K-A, CD-MOF-K-B, and CD-MOF-K-C (Data are expressed as mean  $\pm$ SD,  $n=3$ ).

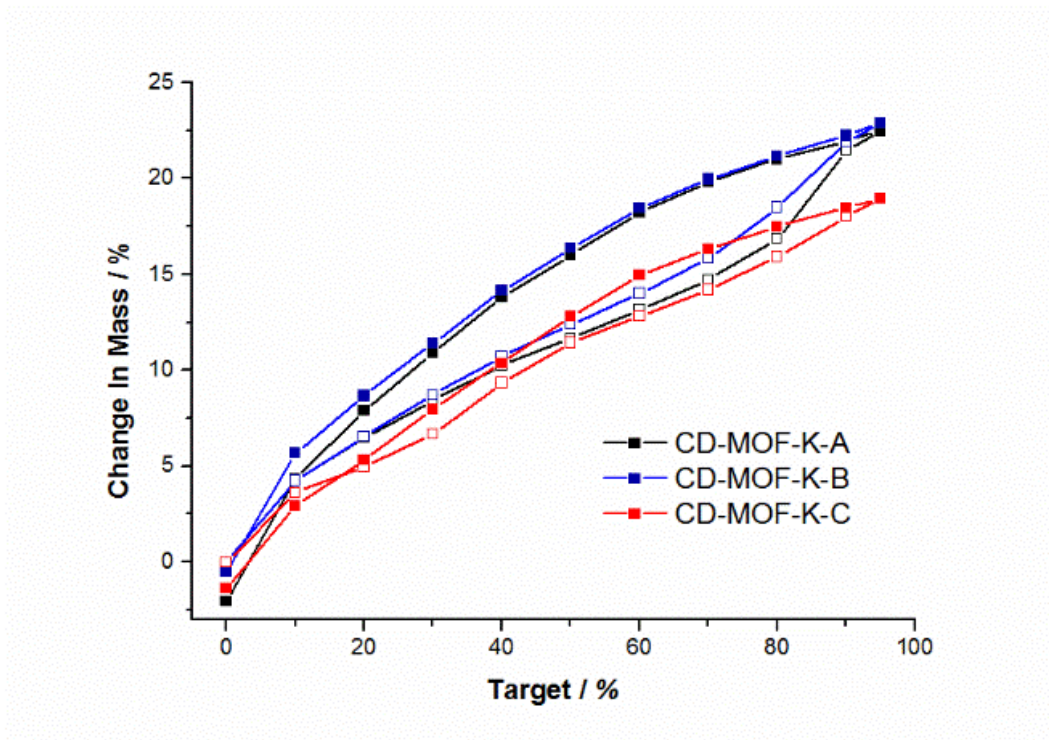

**Figure S6** Water sorption/desorption isotherms for CD-MOF-K-A, CD-MOF-K-B, and CD-MOF-K-C.

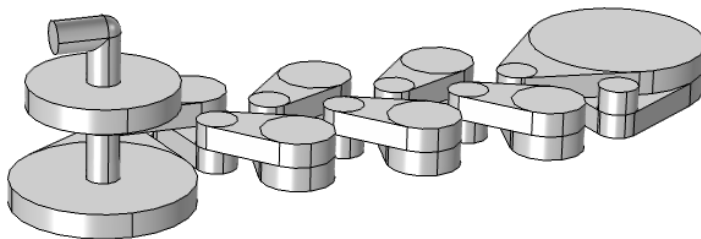

**Figure S7** The NGI model established by finite element method.

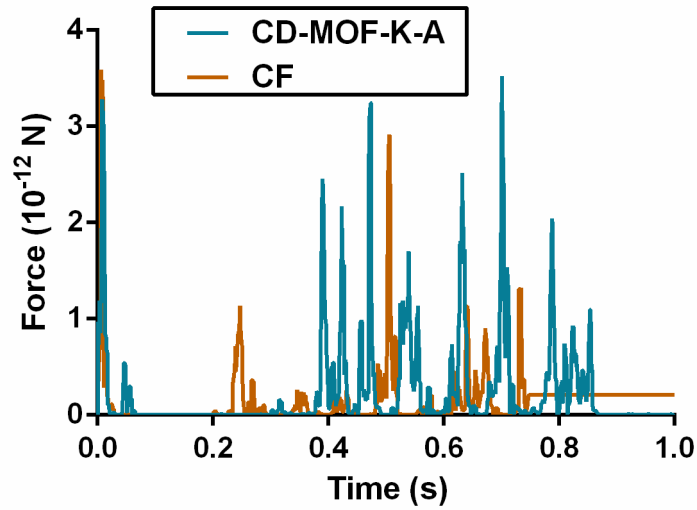

**Figure S8** The drag and lift force of CD-MOF-K-A and CF by finite element method.

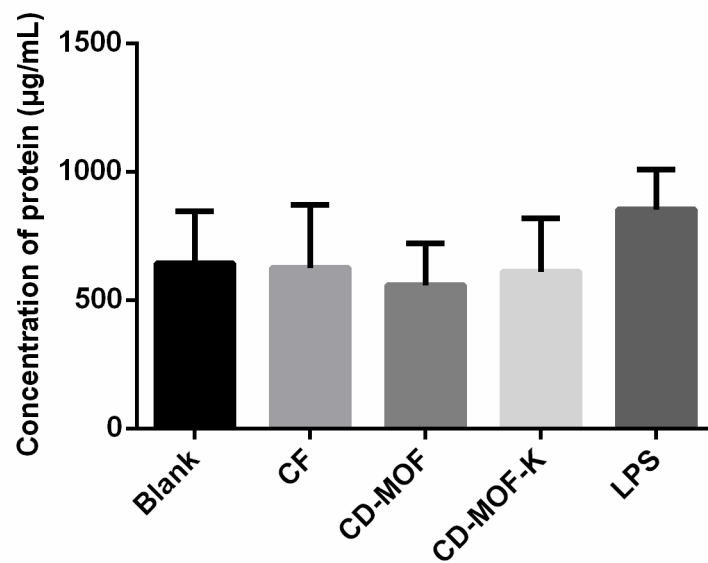

**Figure S9** Protein concentrations in BALF of rats after pulmonary delivery of different samples for 48 h (Data are expressed as mean  $\pm$  SD,  $n=6$ ).

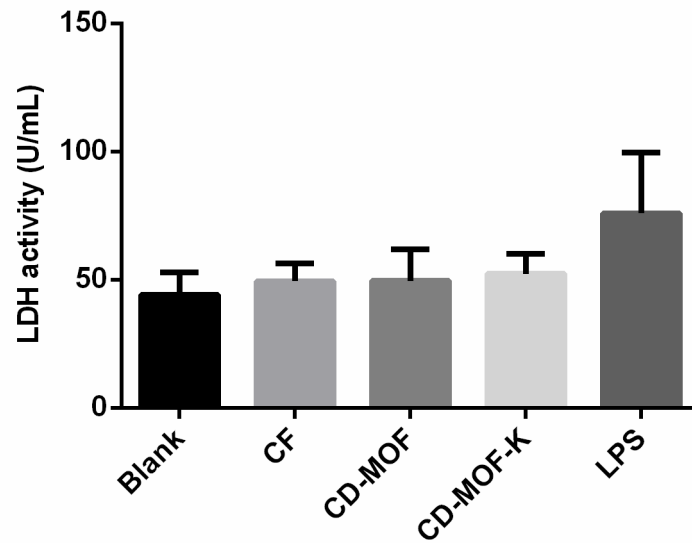

**Figure S10** LDH activity in BALF of rats after pulmonary delivery of different samples into rats for 48 h (Data are expressed as mean  $\pm$ SD,  $n=6$ ).

**Table S1** Particle size distributions of different CD-MOF-K and micronized ketoprofen.

| Sample                | $D[4, 3]$ ( $\mu\text{m}$ ) | $d(0.1)$ ( $\mu\text{m}$ ) | $d(0.5)$ ( $\mu\text{m}$ ) | $d(0.9)$ ( $\mu\text{m}$ ) | $S_{\text{pan}}$ |
|-----------------------|-----------------------------|----------------------------|----------------------------|----------------------------|------------------|
| CD-MOF-K-A            | $2.90 \pm 0.08$             | $0.58 \pm 0.05$            | $1.82 \pm 0.14$            | $6.16 \pm 0.82$            | $3.05 \pm 0.34$  |
| CD-MOF-K-B            | $7.63 \pm 0.79$             | $0.63 \pm 0.03$            | $4.07 \pm 0.16$            | $16.54 \pm 1.55$           | $3.91 \pm 0.42$  |
| CD-MOF-K-C            | $6.73 \pm 0.15$             | $2.89 \pm 0.12$            | $6.20 \pm 0.14$            | $11.54 \pm 0.29$           | $1.40 \pm 0.05$  |
| Micronized ketoprofen | $2.81 \pm 0.09$             | $1.12 \pm 0.06$            | $2.50 \pm 0.08$            | $4.96 \pm 0.15$            | $1.53 \pm 0.04$  |

Data are mean  $\pm$ SD,  $n=3$ .

**Table S2** Bulk density, tapped density, and Carr's index of CD-MOF-K-A, CD-MOF-K-B, CD-MOF-K-C, and CF

| Sample     | Bulk density (mg/cm <sup>3</sup> ) | Tapped density (mg/cm <sup>3</sup> ) | Carr's index (%) |
|------------|------------------------------------|--------------------------------------|------------------|
| CD-MOF-K-A | 219.73 ± 18.97                     | 524.35 ± 39.16                       | 58.09            |
| CD-MOF-K-B | 216.86 ± 15.29                     | 390.55 ± 22.82                       | 44.47            |
| CD-MOF-K-C | 266.97 ± 15.02                     | 420.35 ± 21.70                       | 36.49            |
| CF         | 729.44 ± 4.83                      | 911.81 ± 6.04                        | 20.00            |

Data are expressed as mean ± SD, *n*=3.
